# Supplementary material
Source: ML conference proceedings conference paper supplement (https://aclanthology.org/2021.clpsych-1.2)

**# Articles**

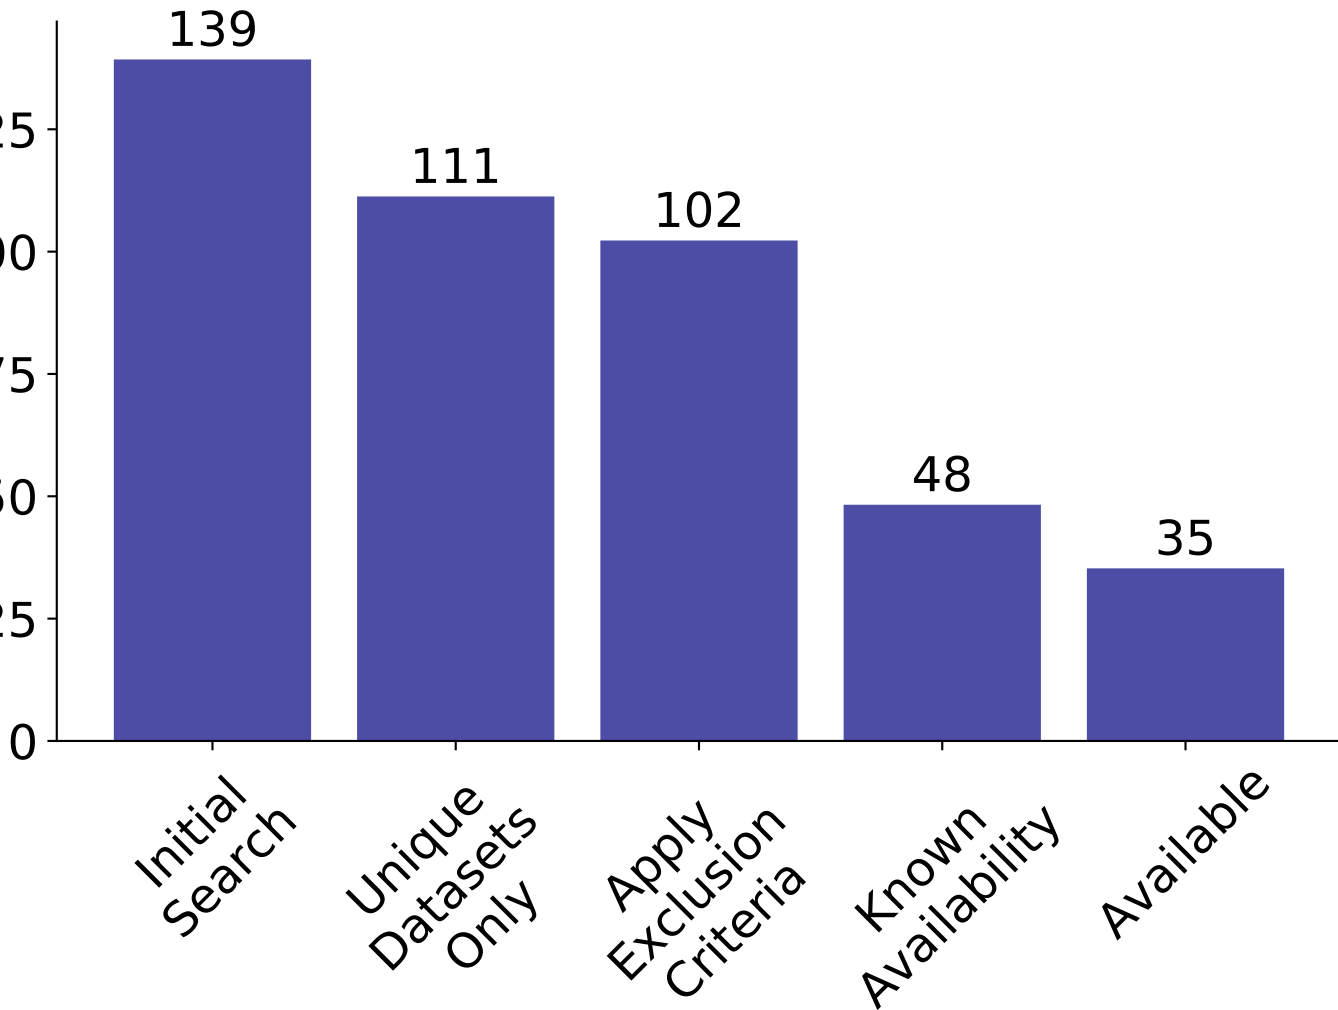

**Filtering Stage**

Supplement: OptionalSupplementaryMaterial [file 2021.clpsych-1.2.OptionalSupplementaryMaterial.zip]
